# Supplementary material
Source: PubMed Central journal article supplement (PMC2980840)
Supplement: NIHMS243383-supplement-1_si_001.pdf [file NIHMS243383-supplement-1_si_001.pdf]

Supporting Information for  
“Functional and Structural Models for the Nickel-Iron  
Hydrogenase”

*by Bryan E. Barton and Thomas B. Rauchfuss*

**Contents:**

- p.2 Illustrative calculation of acid-independent rate constant for  $[2H]^+$ .
- p.3 Figure SI-1. Variable temperature  $^{31}P\{^1H\}$  NMR spectra of **1**.
- p.4 Figure SI-2. Variable temperature  $^{31}P\{^1H\}$  NMR spectra of **3**.
- p.5 Figure SI-3. Deconvolution of IR spectrum of  $[4H]^+$ .
- p.6 Figure SI-4.  $^{13}C\{^1H\}$  NMR spectrum of  $[3H]^+$  at + 19 and -60 °C.
- p.7 Figure SI-5.  $^{13}C\{^1H\}$  NMR spectrum of  $[1H]^+$  at +19 °C.
- p.8 Figure SI-6. Kinetics for H/D exchange of  $[3H]BF_4$  with  $D_2O$ .
- p.9 Figure SI-7. Rate of deprotonation of  $[3H]BF_4$  by  $NEt_3$ .
- p.10 Figure SI-8. Current response for  $[4H]BF_4$  vs.  $[CF_3CO_2H]$ .
- p.11 Figure SI-9.  $^{31}P\{^1H\}$  and high-field  $^1H$  NMR spectra of  $B(C_6F_5)_3$  with **1** and then addition of  $H_2$ .

For the case of hydrogen-evolution catalysis by  $[2H]^+ \cdot$

$$\frac{i_c}{i_p} = \frac{n}{0.4463} \sqrt{\frac{RTk}{Fv}}$$

where n = total number of electrons transferred (2)

R = gas constant (8.31 J mol<sup>-1</sup> K<sup>-1</sup>)

T = temperature (K)

F = Faraday's constant (9.64853E4 C)

v = scan rate (V/s)

k = rate constant (s<sup>-1</sup>)

For  $i_c/i_p = 16$  collected at 0.1 V/s, 298 K

$$16 = (4.4813) * \text{sqrt}(RTK/Fv)$$

$$(3.57)^2 = RTK/Fv$$

$$(12.75)*(96485.3*0.1) = (8.31)(298)k$$

$$49.67 \text{ s}^{-1} = k$$

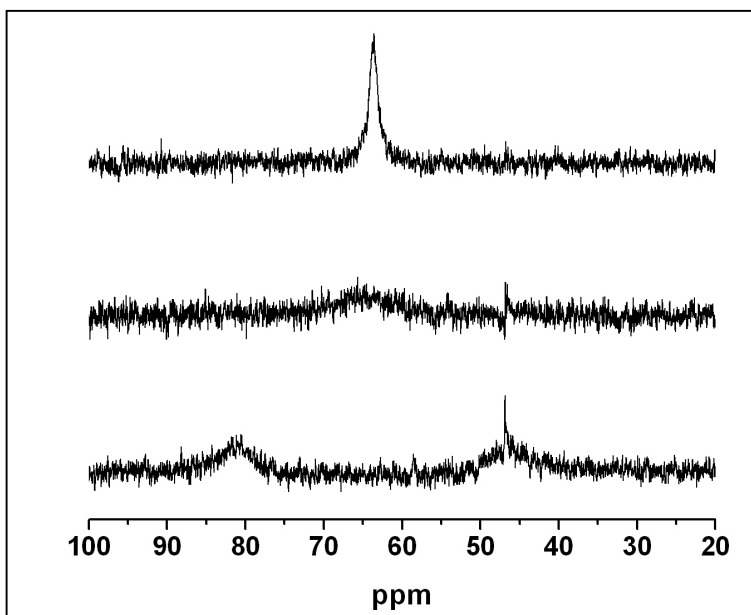

**Figure SI-1.** Variable temperature  $^{31}\text{P}\{^1\text{H}\}$  (161 MHz,  $\text{CD}_2\text{Cl}_2$ ) NMR spectrum of **1**. Top: 0 °C; middle: -30 °C; bottom -68 °C. At the lowest temperature, most of the sample has precipitated from solution at low temperature, verified by ejecting the NMR sample tube. The signal at  $\delta 48$  arises from an impurity of  $\text{Ni}(\text{dppe})_2$ .

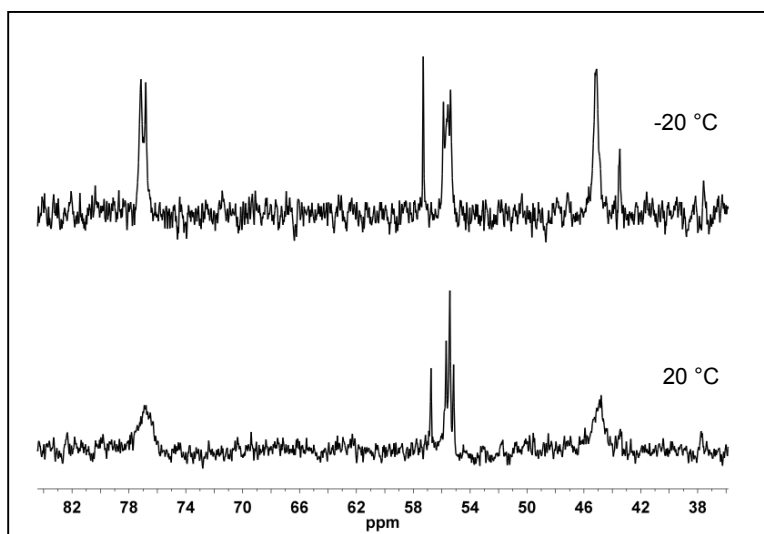

**Figure SI-2.**  $^{31}\text{P}\{^1\text{H}\}$  NMR (161 MHz,  $\text{CD}_2\text{Cl}_2$ ) spectrum of **3**. Signals at  $\delta$  77 and 45 are assigned to the Ni(dppe) center. The signal at  $\delta$  55 is assigned to the  $\text{Fe}(\text{PPh}_3)(\text{CO})_2$  center. Signals at  $\delta$  57 and  $\delta$  44 are assigned to impurities of Ni(pdt)(dppe) and Ni(dppe) $_2$ , respectively. A room temperature spectrum of a cleaner sample of **3** is presented in the main text.

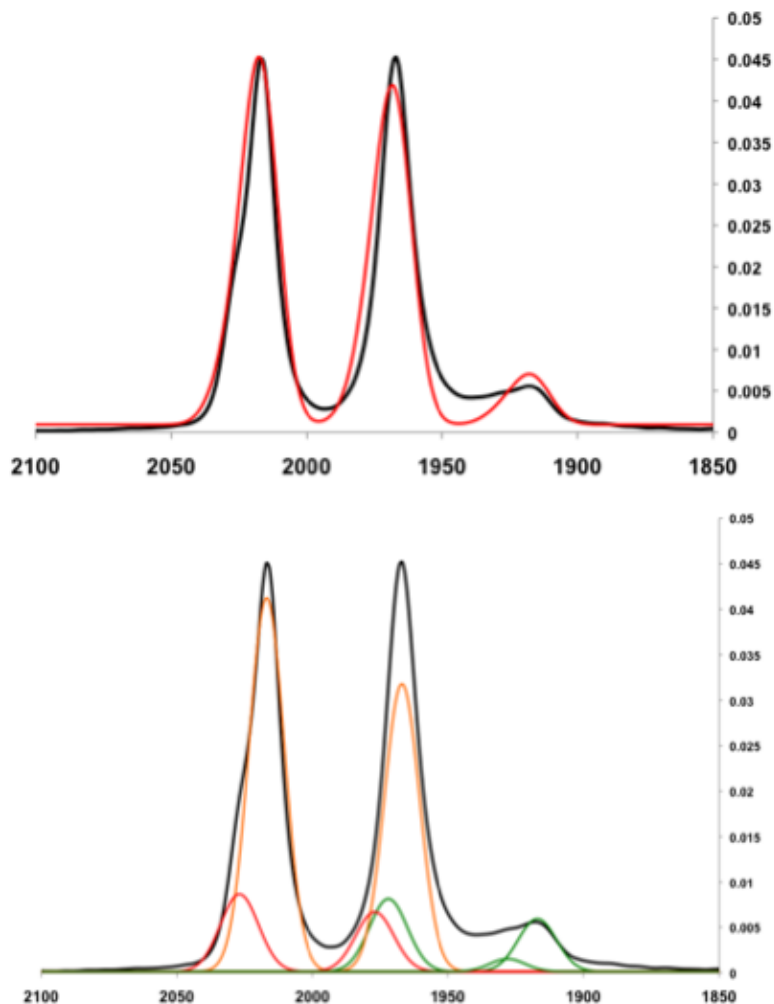

**Figure SI-3.** Bottom: Observed FT-IR spectrum for  $[4H]^+$  in THF solution (black), and simulated as containing 15%  $[4H_2]^{2+}$  (red), 70%  $[4H]^+$  (orange), 15% **4** (green). Simulation parameters for **4** were taken from a fit of **4** in THF (not shown), whereas the spectra for  $[4H]^+$  and  $[4H_2]^{2+}$  were recorded on acetone and  $CH_2Cl_2$  solutions, respectively.

Top: Observed FT-IR for  $[4H]BF_4$  in THF solution (black), and the summation for the simulation (red).

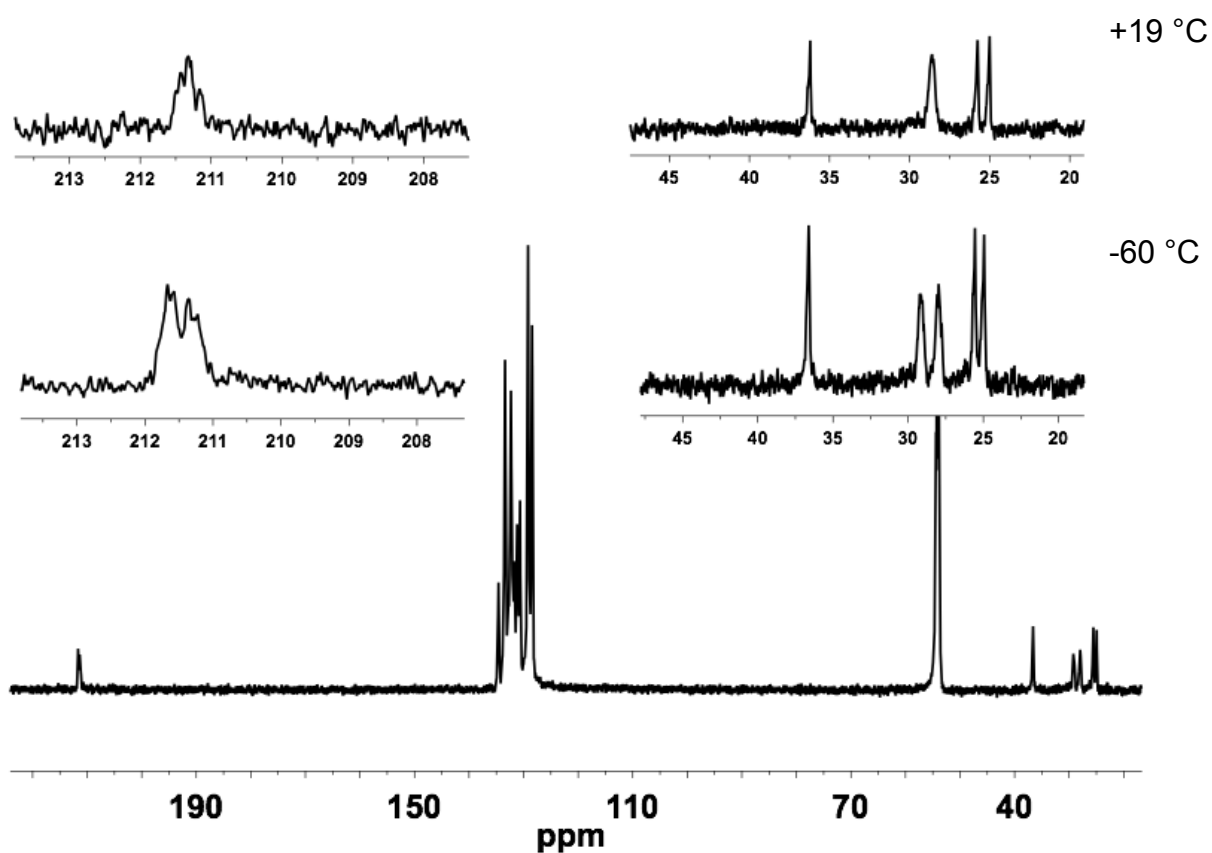

**Figure SI-4.**  $^{13}\text{C}\{^1\text{H}\}$  NMR spectrum ( $\text{CD}_2\text{Cl}_2$ ,  $-60\text{ }^\circ\text{C}$ ) of  $[\text{3H}]\text{BF}_4$  showing three inequivalent  $^{13}\text{C}$  signals for the pdt ligand, two signals for  $\text{PPh}_2\text{CH}_2\text{CH}_2\text{PPh}_2$ , and two signals for  $\text{Fe}(\text{CO})_2(\text{PPh}_3)$ , each appearing with discernable  $^2J_{\text{PC}}$ . Insets show expanded regions of interest and include corresponding  $^{13}\text{C}\{^1\text{H}\}$  NMR spectra at  $+19\text{ }^\circ\text{C}$ , showing that the dppe backbone signals coalesce before the  $\text{SCH}_2\text{N}$

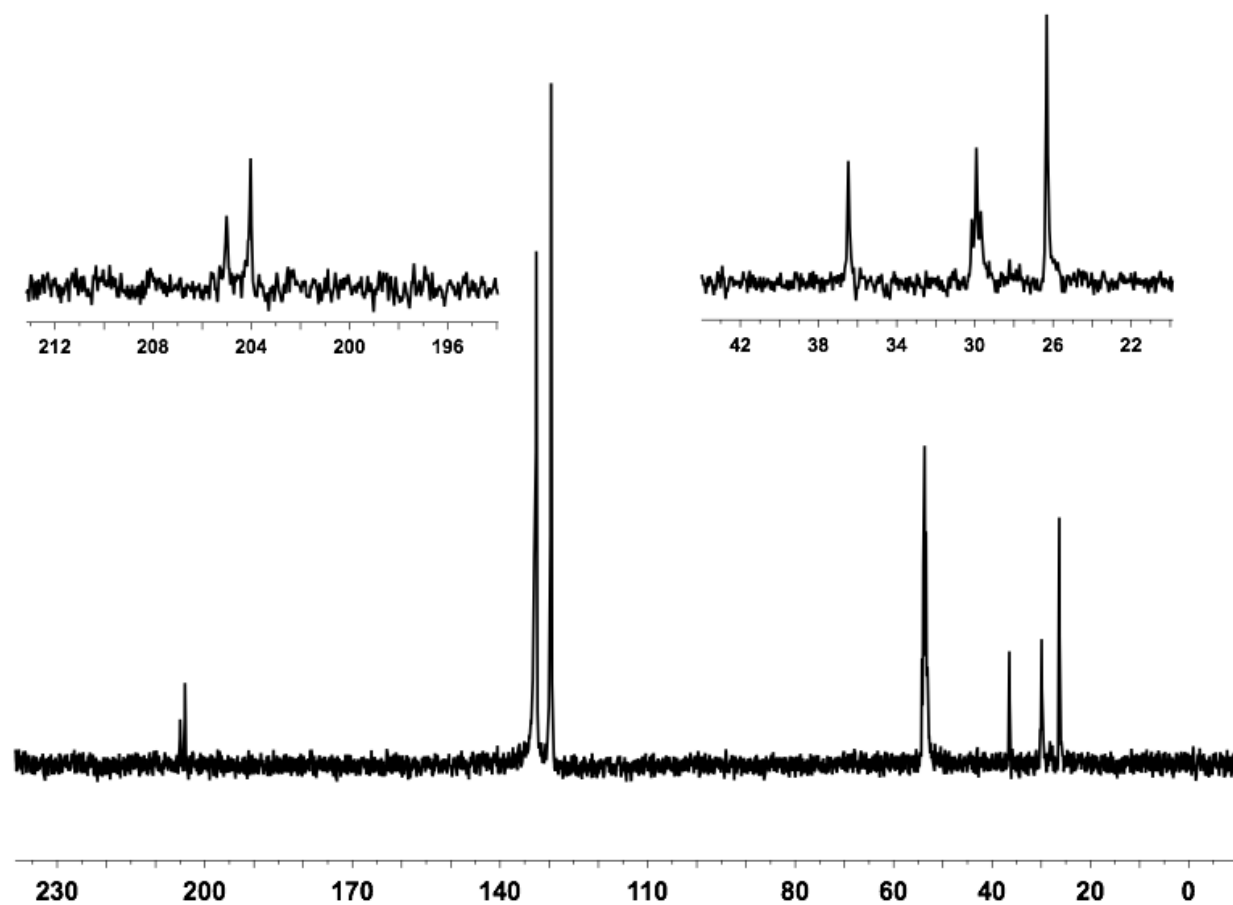

**Figure SI-5.**  $^{13}\text{C}\{^1\text{H}\}$  NMR spectrum ( $\text{CD}_2\text{Cl}_2$ ,  $+19\text{ }^\circ\text{C}$ ) of  $[\text{1H}]\text{BF}_4$  showing two pdt signals (26, 36 ppm), one  $\text{PPh}_2\text{CH}_2\text{CH}_2\text{PPh}_2$  signal ( $t$ , 30 ppm,  $^1J_{\text{PC}} \sim ^2J_{\text{PC}}$ ), and two  $\text{Fe}(\text{CO})_3$  signals (204, 205 ppm).

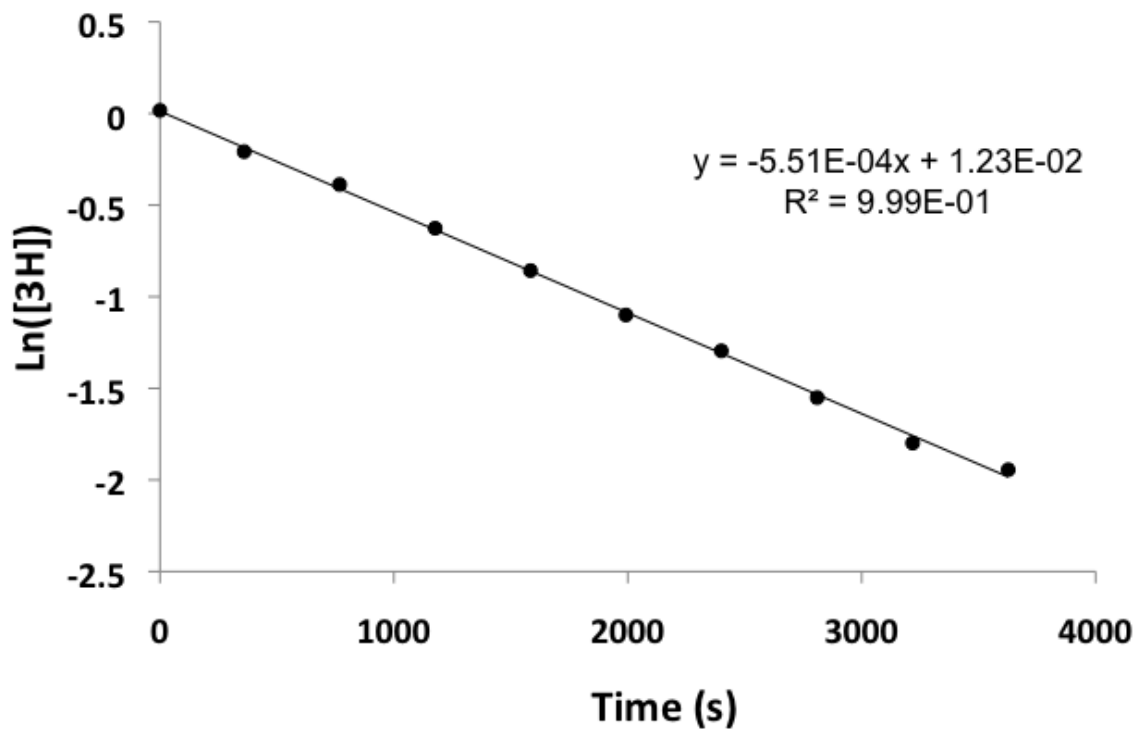

**Figure SI-4.** Pseudo-first-order H/D exchange kinetics of  $[3\text{H}]\text{BF}_4$  in the presence of excess  $\text{D}_2\text{O}$  in  $\text{d}^6$ -acetone solution. Concentration of  $[3\text{H}]\text{BF}_4$  was calculated by integration of the hydride signal ( $\delta -3.08$ ) against a normalized phenyl signal. Under these conditions (see Experimental),  $k = 5.5 \times 10^{-4} \text{ s}^{-1}$  ( $t_{1/2} = 21 \text{ min}$ ).



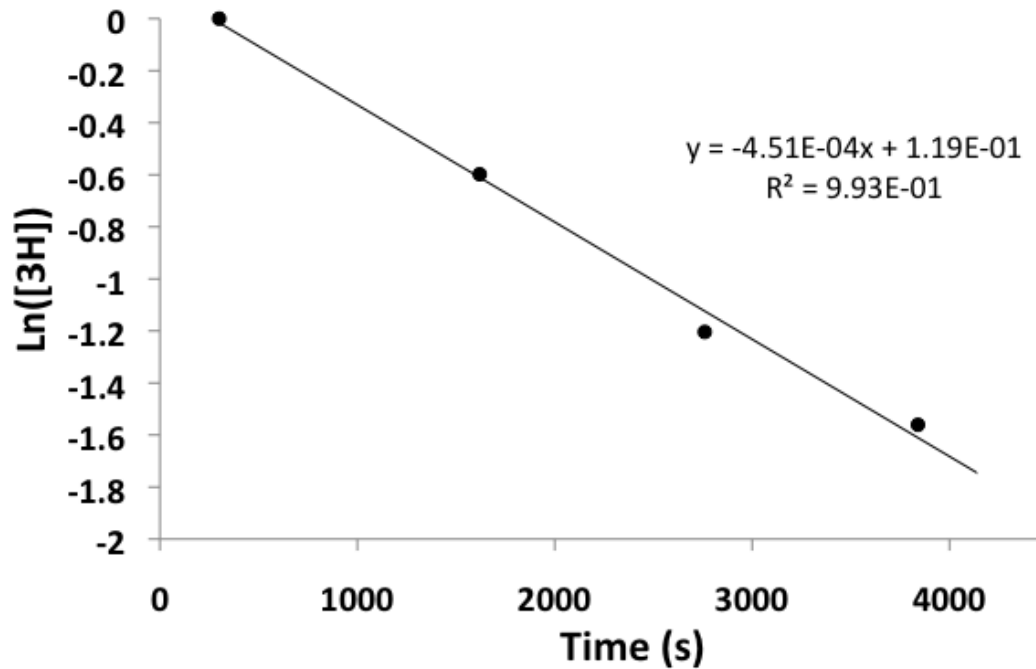

**Figure SI-5.** Pseudo-first-order decay plot for the reaction of  $[3\text{H}]\text{BF}_4$  with  $\text{NEt}_3$  as monitored by  $^{31}\text{P}\{^1\text{H}\}$  NMR spectroscopy. Under these conditions (see Experimental),  $k \sim 4.5 \times 10^{-4} \text{ s}^{-1}$ ,  $t_{1/2} = 28 \text{ min}$ ).

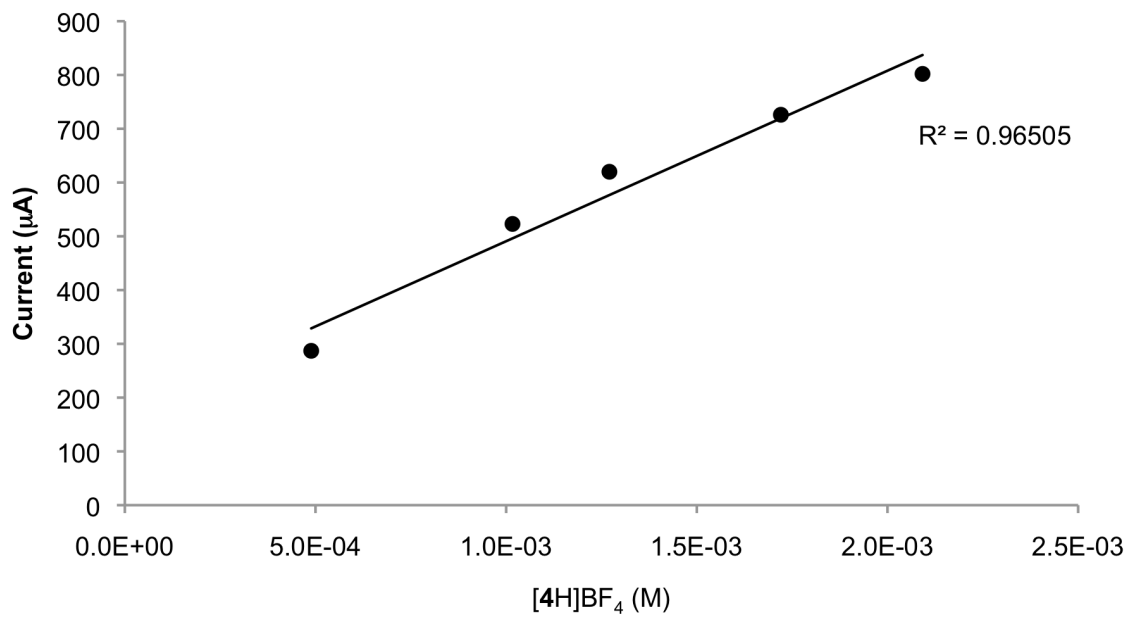

**Figure SI-7.** Dependence of catalytic current for a 0.389 M solution of CF<sub>3</sub>CO<sub>2</sub>H vs. concentration of [4H]BF<sub>4</sub>.

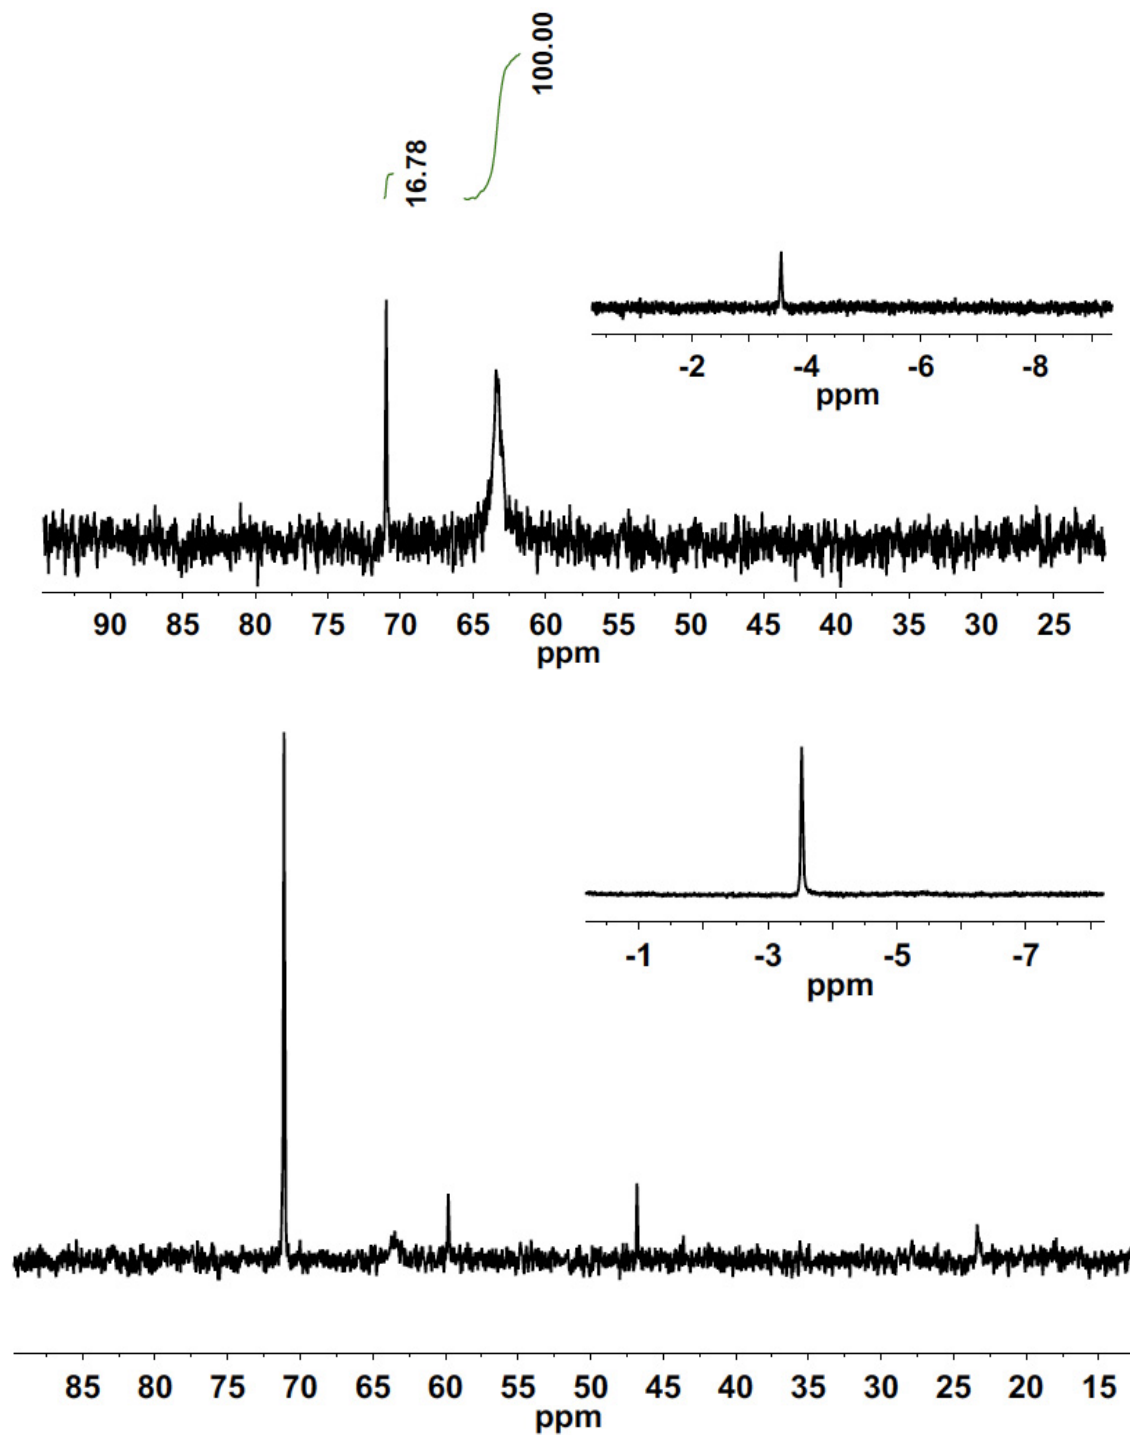

**Figure SI-8.** Top:  $^{31}\text{P}\{^1\text{H}\}$  NMR (202 MHz) of 1 ( $\delta$  64) with  $\text{B}(\text{C}_6\text{F}_5)_3$  showing a ~16% conversion to the hydride  $[\text{1H}]^+$  ( $\delta$  71) presumably from the reaction of  $\text{B}(\text{C}_6\text{F}_5)_3$  and water from the  $\text{CD}_2\text{Cl}_2$  ampule. Bottom:  $^{31}\text{P}\{^1\text{H}\}$  NMR (202 MHz) of the same NMR tube with  $\text{H}_2$  added. Insets: high-field  $^1\text{H}$  NMR spectra (500 MHz) showing bridging hydride signal.

- (1) Frazee, K.; Wilson, A. D.; Appel, A. M.; Rakowski DuBois, M.; DuBois, D. L. *Organometallics* **2007**, 26, 3918-3924.
